# Supplementary material for: High or low? Comparing high and low-variability phonetic training in adult and child second language learners
Source: PeerJ journal article supplement (doi:10.7717/peerj.3209), 2017-05-30
Supplement: S3_Table.pdf [file S3_Table.pdf]

### S3 Table. Analyses with the Control Variable “Talker”.

Note that, as stated in the results section, in addition to the results reported in the main text, we also inspected each model reported as follows: (i) we looked at the main effect of the control variable *talker* (ii) wherever we had found a reliable main effect or interaction with the experimental factors, we looked to see this was qualified by a higher level interaction with *talker*. These analyses are not reported in the main text except in cases where there *was* an interaction and it broke down to show that the effect was only reliable for one of the two talkers.

| Task     | Age group | Co-Efficient                                   |                                              |
|----------|-----------|------------------------------------------------|----------------------------------------------|
| Training | Adults    | Talker *                                       | beta = 2.11, SE = 0.28, z = 7.41, p < .001   |
|          |           | condition by talker                            | beta = 1.73, SE = 0.45, z = 3.82, p < .001   |
|          |           | training-session by talker                     | beta = 0.26, SE = 0.06, z = 4.18, p < .001   |
|          |           | condition by training-session by talker        | beta = 0.26, SE = 0.11, z = 2.44, p = .015   |
|          |           | <b>female 1:</b> condition                     | beta = 0.72, SE = 0.29, z = 2.53, p = .012   |
|          |           | <b>female 1:</b> training-session              | beta = 0.21, SE = 0.02, z = 10.41, p < .001  |
|          |           | <b>female 1:</b> condition by training-session | beta = 0.07, SE = 0.04, z = 1.98 p = .048    |
|          |           | <b>female 2:</b> condition                     | beta = 2.47, SE = 0.44, z = 5.60, p < .001   |
|          |           | <b>female 2:</b> training-session              | beta = 0.49, SE = 0.06, z = 7.53, p < .001   |
|          |           | <b>female 2:</b> condition by training-session | beta = 0.33, SE = 0.11, z = 3.10, p = .002   |
| Training | Children  | talker                                         | beta = 0.19, SE = 0.22, z = 0.85, p = 0.395  |
|          |           | test-half by talker                            | beta = 0.19, SE = 0.28, z = 0.67, p = .506   |
|          |           | condition by test-half by talker               | beta = 0.73, SE = 0.34, z = 2.16, p = .031   |
|          |           | <b>female1, first half:</b> condition          | beta = -0.05, SE = 0.31, z = -0.16, p = .875 |
|          |           | <b>female1, second half:</b> condition         | beta = 0.09, SE = 0.33, z = 0.27, p = .786   |
|          |           | <b>female1, first half:</b> condition          | beta = 0.22, SE = 0.29, z = 0.76, p = .45    |
|          |           | <b>female1, second half:</b> condition         | beta = 1.09, SE = 0.29, z = 3.83, p < .001   |

|                                                                   |          |                                                                                                                                                                                                                                  |                                                                                                                                                                                                                                                                                       |
|-------------------------------------------------------------------|----------|----------------------------------------------------------------------------------------------------------------------------------------------------------------------------------------------------------------------------------|---------------------------------------------------------------------------------------------------------------------------------------------------------------------------------------------------------------------------------------------------------------------------------------|
| Training (high variability)                                       | Both     | talker<br>age-group by talker<br><b>female1:</b> age-group<br><b>female2:</b> age-group                                                                                                                                          | beta = 0.17, SE = 0.22, z = 0.80, p = .423<br>beta = -1.07, SE = 0.44, z = -2.46, p = .014<br>beta = -0.47, SE = 0.30, z = -1.53, p = .126<br>beta = -1.54, SE = 0.31, z = -4.94, p < .001                                                                                            |
| English Introduction                                              | Children | talker<br>training-session by talker<br>training-session by condition by talker                                                                                                                                                  | beta = -0.1, SE = 0.28, z = -0.35, p = .728<br>beta = 0.14, SE = 0.50, z = 0.28, p = .780<br>beta = -0.56, SE = 1.00, z = -0.56, p = .579                                                                                                                                             |
| Primed Auditory Lexical Decision, English prime trials (RT)       | Adults   | talker<br>prime-target relationship by talker                                                                                                                                                                                    | beta = -47.84, SE = 57.93, t = -0.78, p = .438<br>beta = -71.58, SE = 40.29, t = -1.72, p = .09                                                                                                                                                                                       |
| Primed Auditory Lexical Decision, English prime trials (RT)       | Children | talker<br>test-session: talker<br>prime-target relationship by talker                                                                                                                                                            | beta = -70.54, SE = 97.11, t = -0.70, p = .489<br>beta = -245.95, SE = 149.07, t = -1.58, p = .12<br>beta = -8.20, SE = 66.88, t = -0.12, p = .903                                                                                                                                    |
| Primed Auditory Lexical Decision, English prime trials (accuracy) | Children | talker<br>test-session: talker<br>prime-target relationship by talker                                                                                                                                                            | beta = -0.20, SE = 0.26, z = -0.75, p = .453<br>beta = 0.13, SE = 0.23, z = 0.58, p = .566<br>beta = 0.63, SE = 0.32, z = 1.95, p = .052                                                                                                                                              |
| Three-Interval Oddity Discrimination Test.                        | Adults   | talker<br>talker by test-session<br><b>female1:</b> test-session<br><b>female2:</b> test-session<br>voice-novelty by test-session by condition by talker<br>word-novelty by voice-novelty by test-session by condition by talker | beta = 1.68, SE = 0.13, z = 12.66, p < .001<br>beta = -0.59, SE = 0.23, z = -2.53, p = .011<br>beta = -0.23, SE = 0.15, z = -1.51, p = .13<br>beta = -0.82, SE = 0.23, z = -3.61, p < .001<br>beta = 0.37, SE = 0.92, z = 0.40, p = .69<br>beta = 1.89, SE = 1.84, z = 1.03, p = .305 |
| Three-Interval Oddity Discrimination Test.                        | Children | talker<br>test-session by word-type by talker<br>test-session by condition by talker                                                                                                                                             | beta = 0.80, SE = 0.07, z = 10.82, p < .001<br>beta = -0.17, SE = 0.30, z = -0.56, p = .578<br>beta = -0.36, SE = 0.31, z = -1.16, p = .246                                                                                                                                           |
| Three-Interval Oddity Discrimination Test.                        | Both     | talker<br>talker by age group<br><b>female1:</b> age-group<br><b>female2:</b> age-group                                                                                                                                          | beta = 1.17, SE = 0.07, z = 17.28, p < .001<br>beta = -0.83, SE = 0.14, z = -5.97, p < .001<br>beta = -0.40, SE = 0.13, z = -3.02, p = .003<br>beta = -1.22, SE = 0.16, z = -7.88, p < .001                                                                                           |

\*In each case, a positive coefficient for *talker* reflects greater performance with *female2*, which was the more intelligible talker across tasks.
